# Supplementary material for: Comparative antidepressant effects and safety of intravenous racemic ketamine, psilocybin and theta burst stimulation for major depressive disorder: A systematic review and network meta‐analyses of randomized controlled trials
Source: PubMed Central journal article supplement — PCN Rep. 2024 Dec 4;3(4):e70042. doi: 10.1002/pcn5.70042 (PMC11617594; doi:10.1002/pcn5.70042), 2024-12-04
Supplement: PCN5-3-e70042-s003.pdf [file PCN5-3-e70042-s003.pdf]

| Study                    | <u>D1</u> | <u>D2</u> | <u>D3</u> | <u>D4</u> | <u>D5</u> | <u>Overall</u> |
|--------------------------|-----------|-----------|-----------|-----------|-----------|----------------|
| Cao et al., 2019         | +         | +         | +         | +         | +         | +              |
| Chen et al., 2018        | !         | +         | +         | +         | +         | !              |
| Chen et al., 2021        | +         | +         | +         | +         | +         | +              |
| Hu et al., 2016          | +         | +         | +         | +         | +         | +              |
| Ionescu et al., 2019     | +         | +         | +         | +         | +         | +              |
| Singh et al., 2016       | +         | !         | -         | +         | +         | -              |
| Sos et al., 2013         | !         | +         | +         | +         | +         | !              |
| Tiger et al., 2020       | +         | +         | +         | +         | +         | +              |
| Zolghadriha et al., 2024 | +         | +         | +         | +         | +         | +              |
| Baeken et al., 2020      | +         | +         | +         | +         | +         | +              |
| Chou et al., 2023        | +         | +         | +         | +         | +         | +              |
| Christyakov et al., 2015 | +         | +         | +         | +         | !         | !              |
| Cole et al., 2022        | +         | +         | +         | +         | +         | +              |
| Duprat et al., 2016      | !         | +         | +         | +         | +         | !              |
| Guan et al., 2021        | +         | +         | +         | +         | +         | +              |
| Gupta et al., 2024       | +         | +         | +         | +         | +         | +              |
| Holczer et al., 2021     | +         | +         | +         | +         | !         | !              |
| Li et al., 2020          | +         | +         | +         | +         | +         | +              |
| Li et al., 2014          | +         | +         | +         | +         | !         | !              |
| Plewnia et al., 2014     | +         | +         | +         | +         | +         | +              |
| Prasser et al., 2015     | +         | +         | +         | +         | +         | +              |
| Stohrmann et al., 2023   | +         | +         | +         | +         | +         | +              |
| Wilkening et al., 2022   | +         | +         | +         | +         | +         | +              |
| Zhang et al., 2024       | +         | +         | +         | +         | +         | +              |
| Zhao et al., 2023        | +         | +         | +         | !         | +         | !              |
| Goodwin et al., 2022     | +         | +         | +         | +         | +         | +              |
| Raison et al., 2023      | +         | !         | -         | +         | +         | -              |
| von Rotz et al., 2023    | +         | +         | +         | +         | +         | +              |

-  Low risk
-  Some concerns
-  High risk

- D1 Randomisation process
- D2 Deviations from the intended interventions
- D3 Missing outcome data
- D4 Measurement of the outcome
- D5 Selection of the reported result
