# Supplementary figures and images for: Comparative antidepressant effects and safety of intravenous racemic ketamine, psilocybin and theta burst stimulation for major depressive disorder: A systematic review and network meta‐analyses of randomized controlled trials
Source: PubMed Central journal article supplement — PCN Rep. 2024 Dec 4;3(4):e70042. doi: 10.1002/pcn5.70042 (PMC11617594; doi:10.1002/pcn5.70042), 2024-12-04

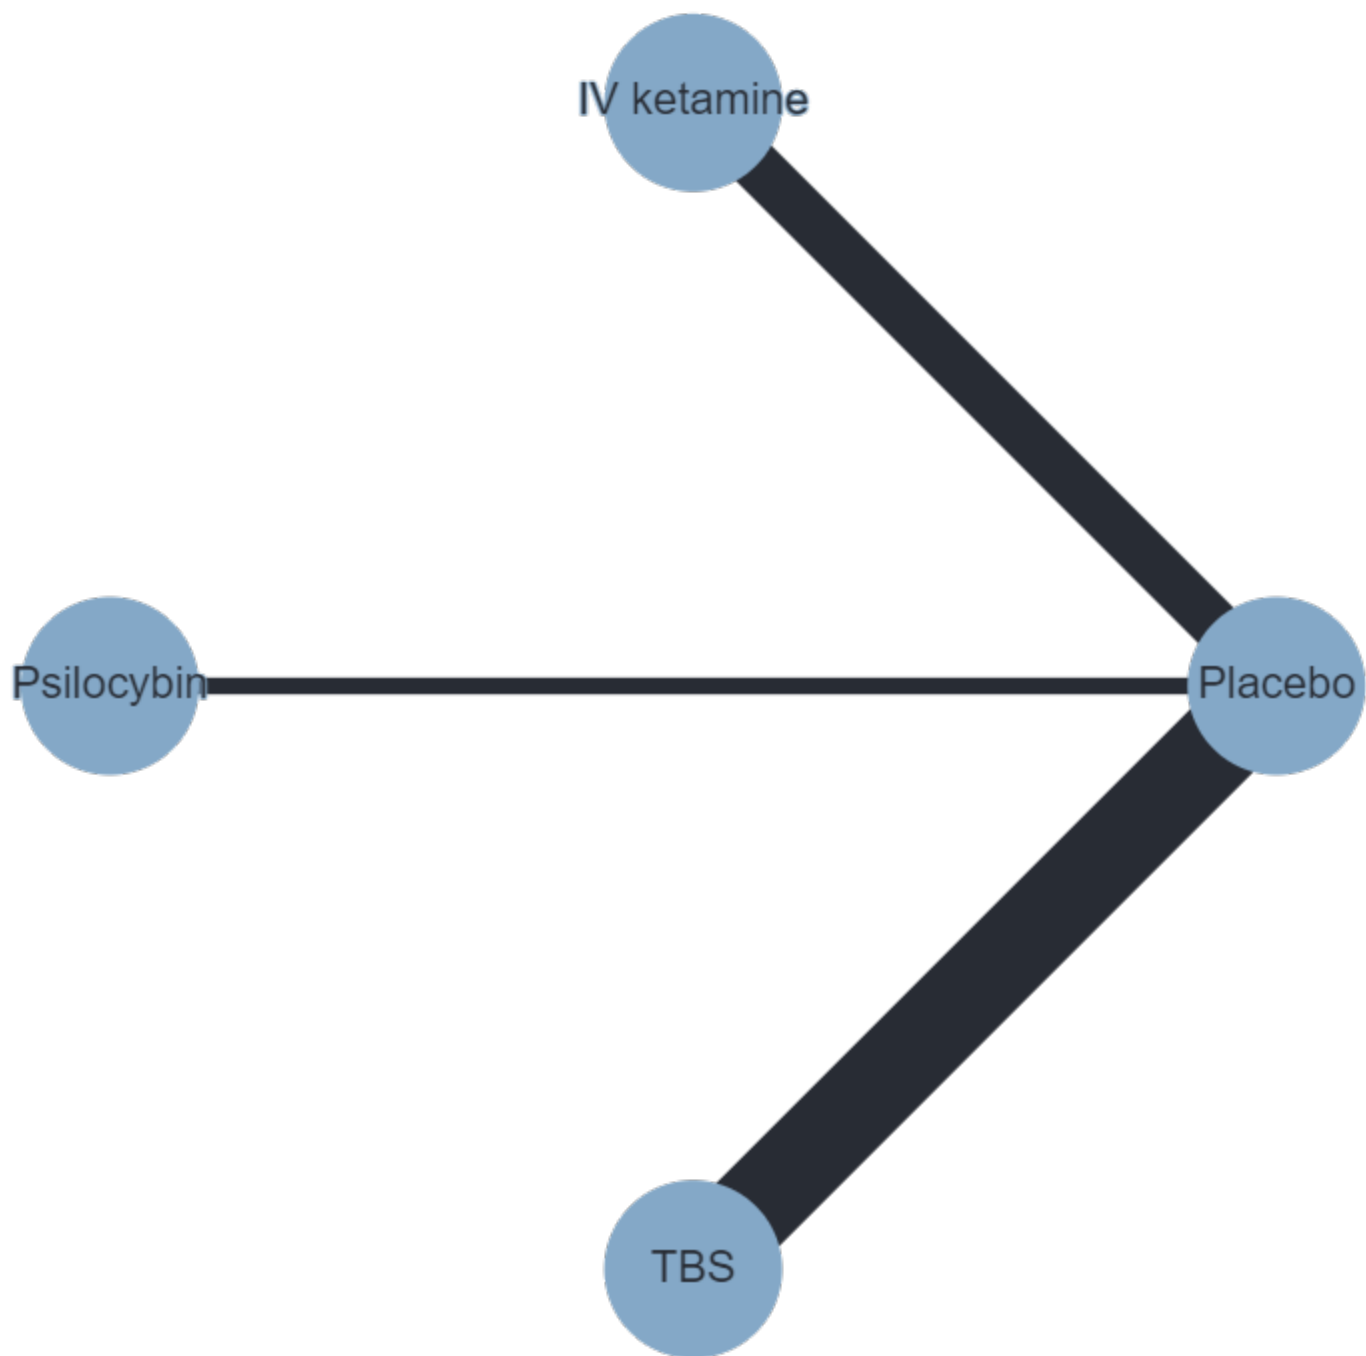

Supplement: PCN5-3-e70042-s001.pdf [file PCN5-3-e70042-s001.pdf]

## Identification of studies via databases and registers

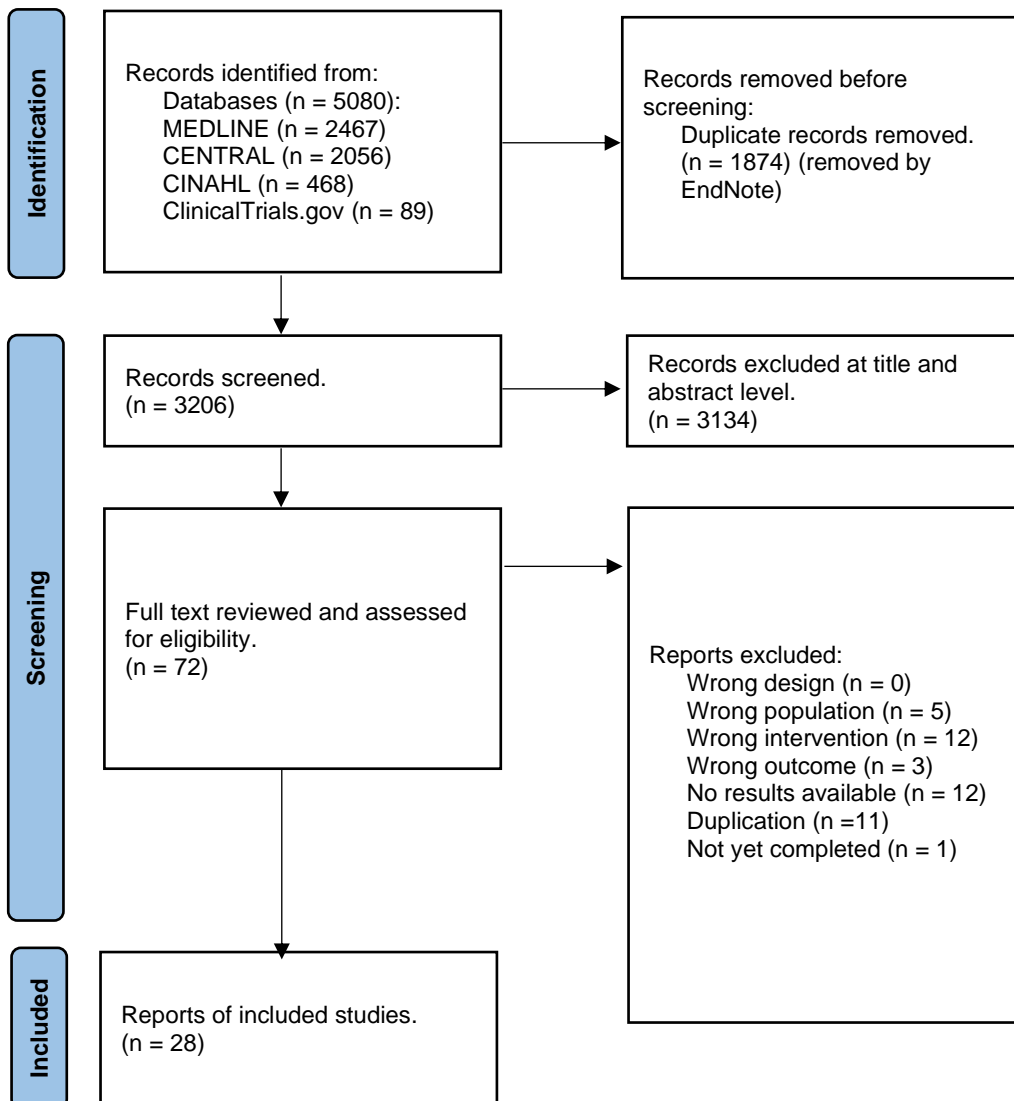

Supplement: PCN5-3-e70042-s004.pdf [file PCN5-3-e70042-s004.pdf]
